# Supplementary material for: Gene Expression of Protein-Coding and Non-Coding RNAs Related to Polyembryogenesis in the Parasitic Wasp, Copidosoma floridanum
Source: PubMed Central journal article supplement (PMC4255003; doi:10.1371/journal.pone.0114372), 2014-12-03
Supplement: pone.0114372.s001.pdf [file pone.0114372.s001.pdf]

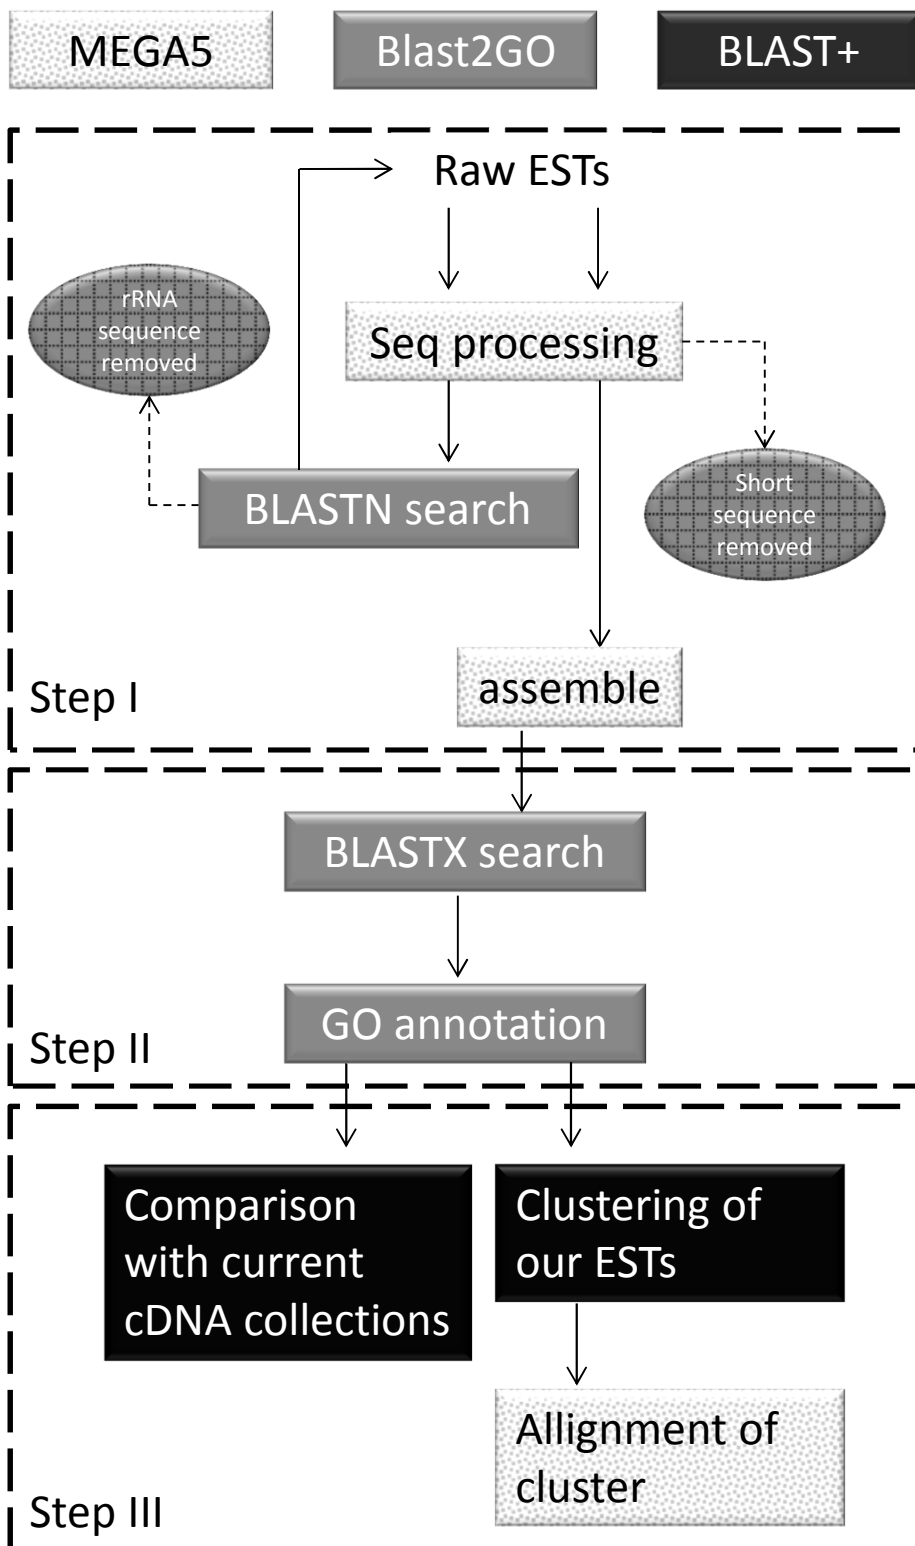

Figure S1
