# Supplementary material for: Gene Expression of Protein-Coding and Non-Coding RNAs Related to Polyembryogenesis in the Parasitic Wasp, Copidosoma floridanum
Source: PubMed Central journal article supplement (PMC4255003; doi:10.1371/journal.pone.0114372), 2014-12-03
Supplement: pone.0114372.s004.pdf [file pone.0114372.s004.pdf]

```

          10          20          30          40          50          60
FY736678 GACATTGAAA TTCAAAATGT TAGCGTACTA TTTTCCTCGCT ATTTGTGTGG TGGGACCTGT
FY736796 GACATTGAAA TACAAAATGT TGGCATACTA TTTTTTTCCT ATTTTCGTGG TGGGACCTCT
FY736573 GACATTGAAA TTCAAAATGT TGGCATACTA TTTTCGTGCT ATTTTGTGG TGGGACCTCT
***** * ***** * ** ***** *** * ** ***** ***** *

          70          80          90          100          110          120
FY736678 CATCTTCATG ACTGAAGTGA TGGGCGCTGG ATCGACCGGA AAAACTGAAA CTACTAGTAC
FY736796 CATCATGACG ACTTAAAGTGA TGGGCG----- -----TAG CACCGACTGA
FY736573 CATCTTGACA ACTGAAGTGG TGGGCC----- -----AGA CATCAAGCAC
**** * * **** ***** ***** * * *

          130          140          150          160          170          180
FY736678 TACTACTACT ACTACAGAAA TTTCCAGAAC CGATTTGGGA GGAAAAATTA CGGGCATTAC
FY736796 AACACCTGCT GACGGCGTGG CT---AGGGC C-----A TCGACAATCT G----CCAAA
FY736573 AGCGATTCCC GATGACAAAA T----AGAAT CAA----AGA TCAATAATTT G----ACTGG
* * * ** * * *

          190          200          210          220          230          240
FY736678 GATATACGAT ACTGGTAAAA TTGAAGACAT TAAACAATTG CTGAAACATA TTTGGCAAAG
FY736796 TCCTTTTAAAC GCCGAGAAGA TAAAAGAC-- -----GCC TTGAACTTCT TGTTAGACAG
FY736573 AACATACGCC TCGGATTTAA CCGCAGCC-- -AAACAAGTG CTGAAAAGATT TCTTACTGAA
* * * * **** * * *

          250          260          270          280          290          300
FY736678 AATTAGAAAT GACAAAAC TG CCATATCAAA AAATCTTACA GTATCAGAGC AAATCGGCAA
FY736796 AATTGATAAT GACAGAAAGA ACCTAACACA AATAGCTGAA GACATTAACC AAGGATCGGA
FY736573 AATTGAAAAT GATAGATTGA ACATAACAAA GTTACATGAA GCATCGAAAA AAGCATTGAA
**** *** ** * * * * * * * * * * * *

          310          320          330          340          350          360
FY736678 TCAGTCTGTA ATATTAGAAA AAGTTGCAAA TAGCGCGCAT ATAAACTGA GCGATGTAGT
FY736796 GAAGTCGGAA GCAGTAAAGA AGATTACAGA TGATTTACTG AAAGAATTAG GCGAAGCAGC
FY736573 CGAATTAGCA AATGCAGAGG TGGTATCAAA CAACCTTATC AAACCAGTAA AGGAGGCATT
* * * * * * * * * * * *

          370          380          390          400          410          420
FY736678 AAGTGACGTA CATCGCGCAA AAGGAGAGGC AGAAAGTGCT TTGACTTCTG GTAAGGCAGC
FY736796 ACAAAAATCA GGTATATG CAG AAGCTCAGGC AAAAAGTGCA TCAATTCTTA TTGCAAAAAGC
FY736573 GGTAGATGCG ACTATCGCAA AGGACAGGG AAGTAATGCA ATGGCTAGTG GAATAAACGC
* * * * * * * * * * * *

          430          440          450          460          470          480
FY736678 AGAAGCTAAA GCTAAAGTTG CATCAGACGA GGCTGTTAAA GCACGGAAAA AGGCGAGAGA
FY736796 AGAAGAACC T GCTGCATACG CAGCGGCAGC TGCAAAAACA GCACAGTTTG AAGCAGAAGA
FY736573 AGAGGTGCTA GCTGCAGATG TTGCTGCATC TGCAAAGGCA GCAGAAGATA GAGCAAGAAC
*** * **** * * * * * * * * * *

          490          500          510          520          530          540
FY736678 CGCATTTAAA AACAGCTCTT CTGTCACTAT ATTTGCATAC GCATACTTAT ATCTCGTTAT
FY736796 GTCTAACAGG CGCAACTCTG GTGTGCTCAC ATCACCATAC GCATACCTAT ATACTTTCAT
FY736573 AGCTTATGAG CGCAGCTCTG GTGTCACTAC ATCACCATAC ACATACTTAC ATCTATTTAT
* * * * * * * * * * * *

          550          560          570          580          590          600
FY736678 GTGTATGTAT GTATTTCTGT ATATTTAACT GATATACAAA TT---TACAT GTACATGGAA
FY736796 ATGTGTGTAT GCTTATCTTT ATATTTAACC GGAAACTAAA ATAGTTTCAT GTACTTCTAC
FY736573 ATGTGTATAT TTTTATCTAT ATATTTAACT GATATATAGT CA---TACAT GGATACAAAT
*** * * * * * * * * * * * * * *

```

 High conserved region

Figure S4
