# Supplementary material for: Gene Expression of Protein-Coding and Non-Coding RNAs Related to Polyembryogenesis in the Parasitic Wasp, Copidosoma floridanum
Source: PubMed Central journal article supplement (PMC4255003; doi:10.1371/journal.pone.0114372), 2014-12-03
Supplement: pone.0114372.s009.pdf [file pone.0114372.s009.pdf]

Table S5 Classification of sequences derived from from *C. floridanum* embryos and duplicated with the formerly registered cDNA sequences derived from larvae<sup>\*1</sup>.

| Sequence Name                | Accession number | Sequence Description                          | Min. eValue | Mean Similarity | Gene ontology terms <sup>*2</sup>   |
|------------------------------|------------------|-----------------------------------------------|-------------|-----------------|-------------------------------------|
| primary morula-stage library |                  |                                               |             |                 |                                     |
| M4728                        | AK442655         | endocuticle structural glycoprotein bd-1-like | 1.63E-39    | 70.95%          | F:structural constituent of cuticle |
| M5281f                       | HX954602         | sorting nexin-25-like                         | 8.42E-42    | 61.30%          | P:single-organism process           |
| M5281r                       | HX954391         | not applicable                                |             |                 | -                                   |

\*1 Accession: DV181803–DV182032 (Donnell and Strand, 2005)

\*2 P: biological process, C: cellular component, F: molecular function
